# Supplementary material for: Mechanistic insight into the hydrazine decomposition on Rh(111): effect of reaction intermediate on catalytic activity
Source: Royal Society of Chemistry journal article supplement (doi:10.1039/c3cp51948a), 2013-01-01
Supplement: c3cp51948a.pdf [file c3cp51948a.pdf]

## Electronic Supplementary Information

### **Mechanistic Insight into the Hydrazine Decomposition on Rh(111):**

### **Effect of Reaction Intermediate on Catalytic Activity**

Zhigang Deng, Xiaoqing Lu\*, Zengqiang Wen, Shuxian Wei, Yunjie Liu, Dianling Fu,

Lianming Zhao, Wenyue Guo\*

*College of Science, China University of Petroleum, Qingdao, Shandong 266580, P. R.*

*China*

\*Corresponding authors: Xiaoqing Lu, Wenyue Guo

E-mail address: luxq@upc.edu.cn and wyguo@upc.edu.cn

Telephone: 86-532-8698-1334; Fax numbers: 86-532-8698-3363

**Fig. S1.** The metastable adsorption configurations involved in hydrazine decomposition on Rh(111).

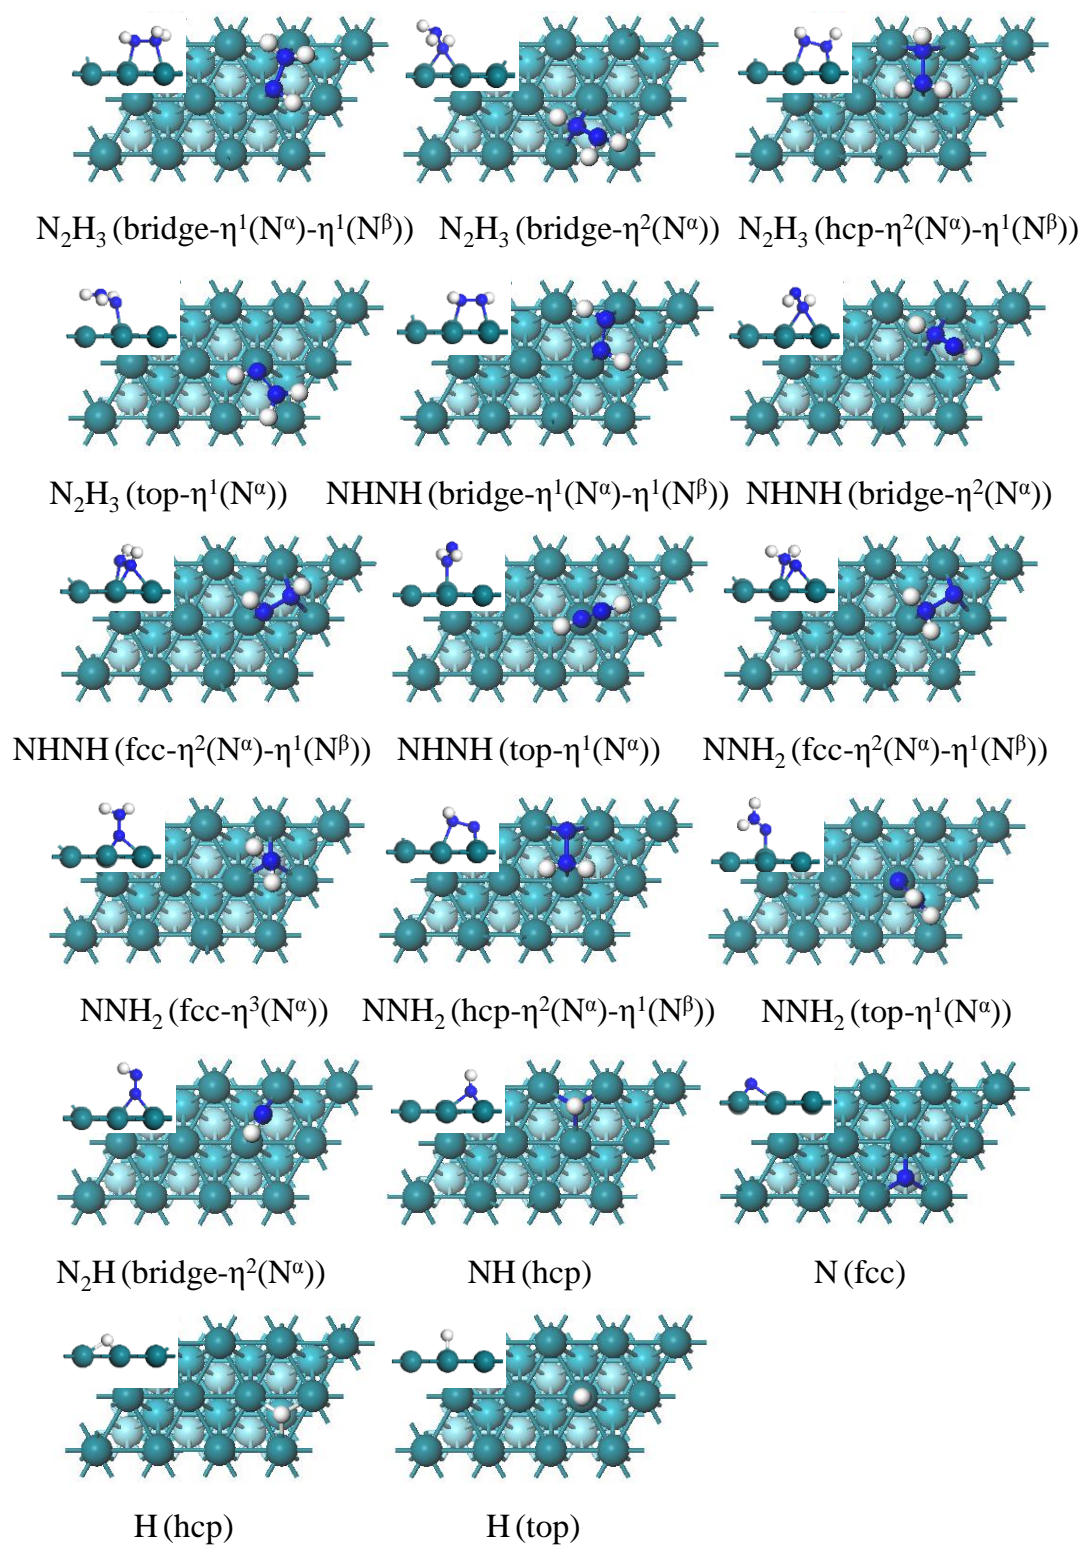

**Fig S2.** Elementary steps of intramolecular  $N_2H_4$  decomposition on Rh(111) ( $2\times 2$ ) slab.

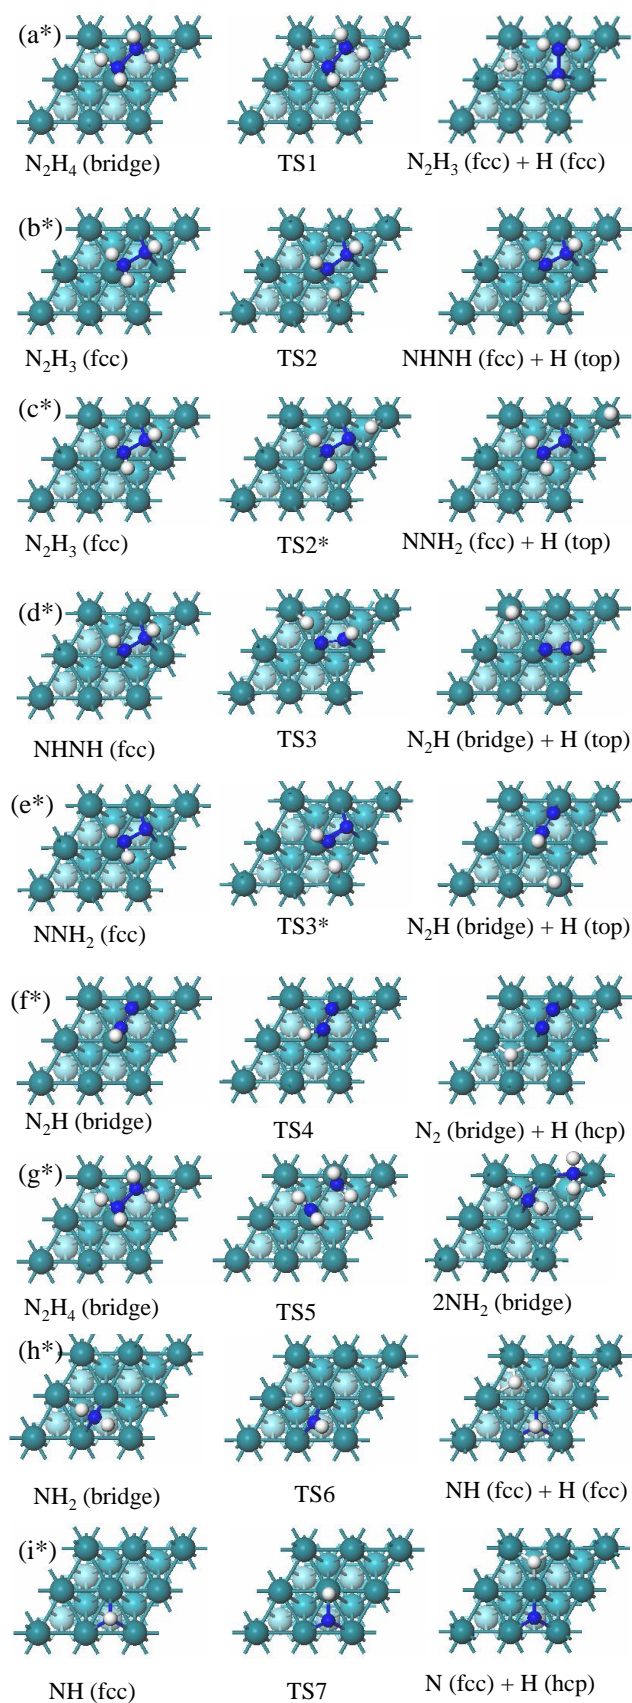

**Fig. S3** PESs of  $\text{NH}_2$  decomposition on Rh(111). The energy reference corresponds to the total energy of one gas-phase  $\text{NH}_2$ , one clean slab, and two adsorbed  $\text{NH}_2$  fragment.

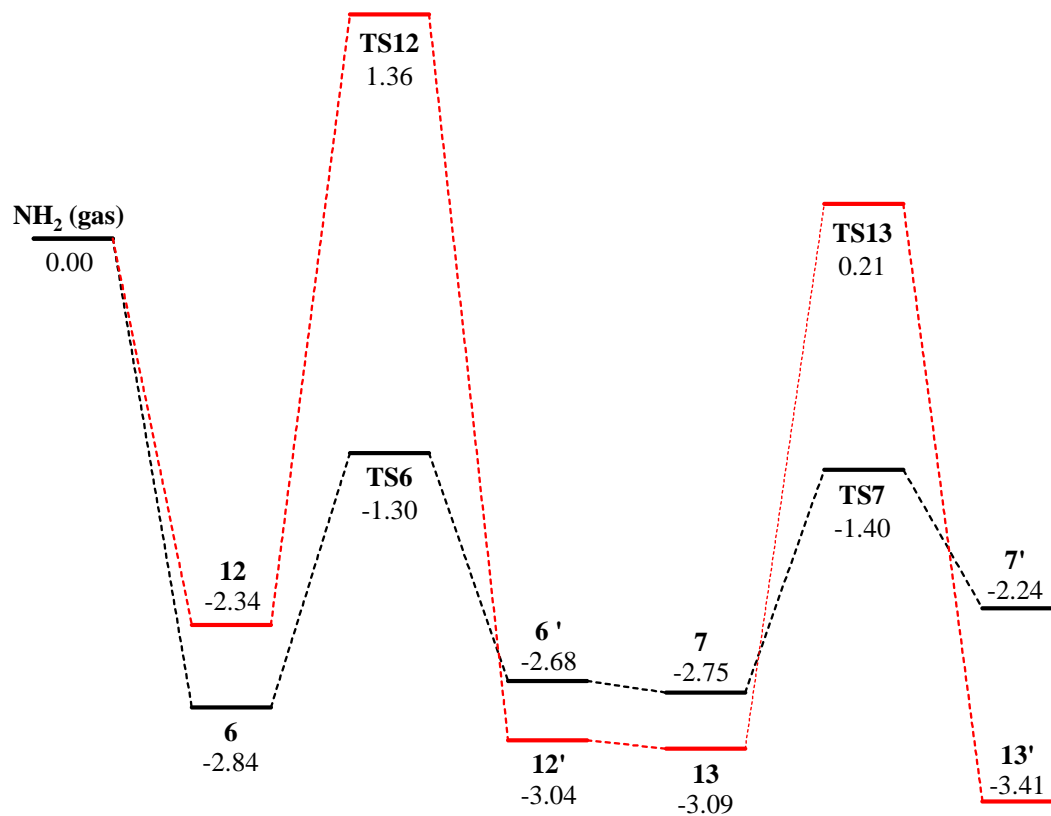

**6**,  $\text{NH}_2^* + 2\text{NH}_2^*$ ; **6'**,  $[\text{NH} + \text{H}]^* + 2\text{NH}_2^*$ ; **7**,  $\text{NH}^* + \text{H}^* + 2\text{NH}_2^*$ ; **7'**,  $[\text{N} + \text{H}]^* + \text{H}^* + 2\text{NH}_2^*$ ; **12**,  $[\text{NH}_2 + \text{NH}_2]^* + \text{NH}_2^*$ ; **12'**,  $[\text{NH} + \text{NH}_3]^* + \text{NH}_2^*$ ; **13**,  $[\text{NH} + \text{NH}_2]^* + \text{NH}_3^*$ ; **13'**,  $[\text{N} + \text{NH}_3]^* + \text{NH}_3^*$ .

**Table S1** Coadsorption configurations, coadsorption energies (in eV), and structural parameters (in angstroms) for the coadsorption systems involved in NH<sub>2</sub>-assisted hydrazine decomposition on Rh(111).

| System                                                            | $E_{ads}$ | $d_{N-N}^a$ | $d_{N-Rh}^b$        | $d_{N-H}^a$                |
|-------------------------------------------------------------------|-----------|-------------|---------------------|----------------------------|
| N <sub>2</sub> H <sub>4</sub> (bridge) + NH <sub>2</sub> (bridge) | 3.67      | 1.450       | 2.248, 2.248        | 1.027, 1.027, 1.030, 1.031 |
| N <sub>2</sub> H <sub>3</sub> (fcc) + NH <sub>2</sub> (bridge)    | 4.80      | 1.439       | 2.118, 2.152, 2.165 | 1.025, 1.027, 1.027        |
| NHNH (hcp) + NH <sub>2</sub> (bridge)                             | 4.41      | 1.393       | 2.082, 2.094, 2.123 | 1.027, 1.032               |
| NNH <sub>2</sub> (fcc) + NH <sub>2</sub> (bridge)                 | 6.01      | 1.436       | 2.056, 2.068, 2.126 | 1.026, 1.027               |
| N <sub>2</sub> H (bridge) + NH <sub>2</sub> (bridge)              | 4.58      | 1.254       | 1.963, 2.079        | 1.035                      |

<sup>a</sup> The N–N and N–H bonds in the N<sub>2</sub>H<sub>x</sub> fragment. <sup>b</sup> The distance between the N atoms of N<sub>2</sub>H<sub>x</sub> and surface Rh atoms.

**Table S2** Energy barriers  $E_a$  and reaction energies  $\Delta E$  (in eV) for the elementary steps involved in intramolecular hydrazine decomposition on Rh(111) (2×2) slab.

| Reactions                                                               | $E_a$ | $\Delta E$ |
|-------------------------------------------------------------------------|-------|------------|
| (a*) $\text{N}_2\text{H}_4 \rightarrow \text{N}_2\text{H}_3 + \text{H}$ | 0.75  | -0.30      |
| (b*) $\text{N}_2\text{H}_3 \rightarrow \text{NHNH} + \text{H}$          | 1.07  | 0.63       |
| (c*) $\text{N}_2\text{H}_3 \rightarrow \text{NNH}_2 + \text{H}$         | 1.50  | 0.46       |
| (d*) $\text{NHNH} \rightarrow \text{N}_2\text{H} + \text{H}$            | 1.04  | 0.11       |
| (e*) $\text{NNH}_2 \rightarrow \text{N}_2\text{H} + \text{H}$           | 1.12  | 0.20       |
| (f*) $\text{N}_2\text{H} \rightarrow \text{N}_2 + \text{H}$             | 0.99  | -0.28      |
| (g*) $\text{N}_2\text{H}_4 \rightarrow 2\text{NH}_2$                    | 0.46  | -0.81      |
| (h*) $\text{NH}_2 \rightarrow \text{NH} + \text{H}$                     | 1.53  | 0.24       |
| (i*) $\text{NH} \rightarrow \text{N} + \text{H}$                        | 1.29  | 0.57       |

**Table S3** Diffusion barrier ( $E_{diff}$ ), reaction energy ( $\Delta E$ ) (in eV) for the diffusion of some species on Rh(111)- (2×3) slab.

| Diffusion                                                                                                                           | $E_{diff}$ | $\Delta E$ |
|-------------------------------------------------------------------------------------------------------------------------------------|------------|------------|
| $\text{N}_2\text{H}_4$ (top) $\rightarrow$ $\text{N}_2\text{H}_4$ (bridge)                                                          | 0.03       | 0.01       |
| $\text{N}_2\text{H}_4$ (bridge) + $\text{NH}_2$ (bridge-1) $\rightarrow$ $\text{N}_2\text{H}_4$ (bridge) + $\text{NH}_2$ (bridge-2) | 0.39       | 0.04       |
| $\text{N}_2\text{H}_4$ (top) + $\text{NH}_2$ (bridge-1) $\rightarrow$ $\text{N}_2\text{H}_4$ (bridge) + $\text{NH}_2$ (bridge-2)    | 0.69       | 0.21       |
